# Supplementary material for: Motivators and Barriers to Maintaining Healthy Weight in Young Adult College Males
Source: Royal Society of Chemistry journal article supplement (doi:10.1039/d4cp03676j), 2006-01-01
Supplement: d4cp03676j1.zip [file d4cp03676j1.zip]

**Supplementary Information: Comparing coupled cluster and composite quantum chemical methods for computing activation energies and reaction enthalpies of radical propagation reactions**

Timothy B. Huber<sup>1</sup> and Ralph A. Wheeler<sup>\*1</sup>

*Department of Chemistry and Biochemistry, Northern Illinois University,  
1425 W Lincoln Hwy. DeKalb, Illinois 60115, USA*

(\*Electronic mail: [rwheeler5@niu.edu](mailto:rwheeler5@niu.edu))

(Dated: 21 September 2024)

## A. Statistical Error Analysis

Statistical error within the manuscript are defined as follows:

- Change in property of interest ( $\Delta_p$ ), where  $p$  is the property of interest (i.e. activation energy or reaction enthalpy).

$$\Delta_p = p_{\text{measured}} - p_{\text{reference}} \quad (\text{S1})$$

- Mean Deviation (MD)

$$MD = \frac{1}{N} \sum_i^N \Delta_{p_i} \quad (\text{S2})$$

- Mean Absolute Deviation (MAD)

$$MAD = \frac{1}{N} \sum_i^N |\Delta_{p_i}| \quad (\text{S3})$$

- Maximum Absolute Deviation (MaxAD)

$$MaxAD = \text{MAX}(|\Delta_{p_i}|) \quad (\text{S4})$$

- Corrected Sample Standard Deviation (SD)

$$SD = \sqrt{\frac{\sum_i^N |\Delta_{p_i} - MD|^2}{N - 1}} \quad (\text{S5})$$

## B. Multi-Reference Diagnostics

- $T_1$  diagnostic: obtained from canonical CCSD(T)/aug-cc-pVTZ calculations in Orca
- $\langle S^2 \rangle$  diagnostic: obtained from UHF calculations in Orca
- $\Delta \langle S^2 \rangle$  diagnostic: Relative deviation (%) from the exact  $\langle S^2 \rangle$  expectation value indicating spin-symmetry breaking:

$$\Delta \langle S^2 \rangle = \frac{|\langle S^2 \rangle_{method} - \langle S^2 \rangle_{exact}|}{\langle S^2 \rangle_{exact}} * 100 \quad (S6)$$

TABLE S1. Spin operator ( $\langle S^2 \rangle$ ), spin operator deviation error ( $\Delta \langle S^2 \rangle$ ), and T1 diagnostic values for the open-shell species amongst the 18 free radical polymerization systems. The properties were computed using UHF/cc-pVTZ, UHF-CCSD(T)/aug-cc-pVTZ, and UB3LYP-CCSD(T)/aug-cc-pVTZ.

| System | Fragment     | UHF                   |                              | UHF-CCSD(T)           |                              |               | UB3LYP-CCSD(T)        |                              |               |
|--------|--------------|-----------------------|------------------------------|-----------------------|------------------------------|---------------|-----------------------|------------------------------|---------------|
|        |              | $\langle S^2 \rangle$ | $\Delta \langle S^2 \rangle$ | $\langle S^2 \rangle$ | $\Delta \langle S^2 \rangle$ | T1 diagnostic | $\langle S^2 \rangle$ | $\Delta \langle S^2 \rangle$ | T1 diagnostic |
|        | methyl       | 0.761661              | 1.6                          | 0.761738              | 1.6                          | 0.008618509   | 0.761738              | 1.6                          | 0.008618509   |
|        | acetonitrile | 0.935696              | 24.8                         | 0.935091              | 24.7                         | 0.035086599   | 0.935091              | 24.7                         | 0.035086599   |
|        | methanol     | 0.761917              | 1.6                          | 0.76227               | 1.6                          | 0.015733226   | 0.76227               | 1.6                          | 0.015733226   |
| 1      | TS           | 1.000417              | 33.4                         | 0.987294              | 31.6                         | 0.031025885   | 0.987294              | 31.6                         | 0.030603388   |
|        | product      | 0.763238              | 1.8                          | 0.763344              | 1.8                          | 0.010709568   | 0.763344              | 1.8                          | 0.010709568   |
| 2      | TS           | 0.997832              | 33.0                         | 0.987294              | 31.6                         | 0.031025885   | 0.987294              | 31.6                         | 0.031025885   |
|        | product      | 0.764402              | 1.9                          | 0.764521              | 1.9                          | 0.011012768   | 0.764521              | 1.9                          | 0.011012768   |
| 3      | TS           | 0.996346              | 32.8                         | 0.983012              | 31.1                         | 0.024880423   | 0.983012              | 31.1                         | 0.024880423   |
|        | product      | 0.764283              | 1.9                          | 0.764389              | 1.9                          | 0.01080938    | 0.764389              | 1.9                          | 0.01080938    |
| 4      | TS           | 0.995225              | 32.7                         | 0.983012              | 31.1                         | 0.024880423   | 0.983012              | 31.1                         | 0.024880423   |
|        | product      | 0.764607              | 1.9                          | 0.764687              | 2.0                          | 0.011218815   | 0.764687              | 2.0                          | 0.011218815   |
| 5      | TS           | 0.960289              | 28.0                         | 0.983012              | 31.1                         | 0.024880423   | 0.983012              | 31.1                         | 0.024880423   |
|        | product      | 0.76189               | 1.6                          | 0.761949              | 1.6                          | 0.013870978   | 0.761949              | 1.6                          | 0.013870978   |
| 6      | TS           | 0.986667              | 31.6                         | 0.985364              | 31.4                         | 0.024418507   | 0.985364              | 31.4                         | 0.024418507   |
|        | product      | 0.76167               | 1.6                          | 0.761821              | 1.6                          | 0.013628154   | 0.761821              | 1.6                          | 0.013628154   |
| 7      | TS           | 0.975441              | 30.1                         | 0.987294              | 31.6                         | 0.031025885   | 0.987294              | 31.6                         | 0.031025885   |
|        | product      | 0.76283               | 1.7                          | 0.762938              | 1.7                          | 0.01582162    | 0.762938              | 1.7                          | 0.01582162    |
| 8      | TS           | 0.995159              | 32.7                         | 0.983012              | 31.1                         | 0.024880423   | 0.983012              | 31.1                         | 0.024880423   |
|        | product      | 0.767059              | 2.3                          | 0.767448              | 2.3                          | 0.012938077   | 0.767448              | 2.3                          | 0.012938077   |
| 9      | TS           | 0.985462              | 31.4                         | 0.983012              | 31.1                         | 0.024880423   | 0.983012              | 31.1                         | 0.024880423   |
|        | product      | 0.762735              | 1.7                          | 0.762911              | 1.7                          | 0.012221537   | 0.762911              | 1.7                          | 0.012221537   |
| 10     | TS           | 0.993722              | 32.5                         | 0.99289               | 32.4                         | 0.026037854   | 0.99289               | 32.4                         | 0.026037854   |
|        | product      | 0.766668              | 2.2                          | 0.766926              | 2.3                          | 0.012538226   | 0.766926              | 2.3                          | 0.012538226   |
| 11     | TS           | 1.006789              | 34.2                         | 0.99289               | 32.4                         | 0.026037854   | 0.99289               | 32.4                         | 0.026037854   |
|        | product      | 0.768262              | 2.4                          | 0.768664              | 2.5                          | 0.01357162    | 0.768664              | 2.5                          | 0.01357162    |
| 12     | TS           | 0.993466              | 32.5                         | 0.99289               | 32.4                         | 0.026037854   | 0.99289               | 32.4                         | 0.026037854   |
|        | product      | 0.794931              | 6.0                          | 0.794068              | 5.9                          | 0.016303846   | 0.756297              | 0.8                          | 0.011340002   |
| 13     | TS           | 0.99289               | 32.4                         | 0.99289               | 32.4                         | 0.026037854   | 0.99289               | 32.4                         | 0.026037854   |
|        | product      | 0.926371              | 23.5                         | 0.794068              | 5.9                          | 0.016303846   | 0.926374              | 32.4                         | 0.017208656   |
| 14     | TS           | 1.120165              | 49.4                         | 1.113515              | 48.5                         | 0.035607735   | 0.99289               | 32.4                         | 0.026037854   |
|        | product      | 0.9071                | 20.9                         | 0.904488              | 20.6                         | 0.02491674    | 0.765693              | 2.1                          | 0.02491674    |
| 15     | TS           | 1.117957              | 49.1                         | 1.115758              | 48.8                         | 0.032777432   | 0.77775               | 3.7                          | 0.015034552   |
|        | product      | 0.919674              | 22.6                         | 0.918905              | 22.5                         | 0.024256591   | 0.764649              | 2.0                          | 0.011323133   |
| 16     | TS           | 0.986135              | 31.5                         | 0.984007              | 31.2                         | 0.029321177   | 0.984007              | 31.2                         | 0.029321177   |
|        | product      | 0.763371              | 1.8                          | 0.763486              | 1.8                          | 0.011738446   | 0.763486              | 1.8                          | 0.011738446   |
| 17     | TS           | 1.115702              | 48.8                         | 1.113349              | 48.4                         | 0.034042284   | 1.113349              | 48.4                         | 0.034042284   |
|        | product      | 0.76313               | 1.8                          | 0.76326               | 1.8                          | 0.012427795   | 0.76326               | 1.8                          | 0.012427795   |
| 18     | product      | 1.324506              | 76.6                         | 1.32281               | 76.4                         | 0.03252394    | 0.777311              | 3.6                          | 0.010035777   |

## C. Scaled Zero-Point Energies

TABLE S2. Scaled ( $\times 0.9764$ ) zero point energies (Ha) for the substituted olefin, transition state (TS), and product radical of 18 radical addition reactions computed using B3LYP/cc-pVTZ.

| System | Fragment      | Zero-point energy |
|--------|---------------|-------------------|
| 1      | methyl        | 0.02896598        |
|        | methylcyanide | 0.030246431       |
|        | methylhydroxy | 0.036252756       |
| 2      | olefin        | 0.049714382       |
|        | TS            | 0.082303197       |
|        | Product       | 0.085946243       |
| 3      | olefin        | 0.077528503       |
|        | TS            | 0.109558817       |
|        | product       | 0.113404661       |
| 4      | olefin        | 0.105526773       |
|        | TS            | 0.137511977       |
|        | product       | 0.141314763       |
| 5      | olefin        | 0.104913887       |
|        | TS            | 0.13669932        |
|        | product       | 0.141246219       |
| 6      | olefin        | 0.110067619       |
|        | TS            | 0.142014646       |
|        | product       | 0.146945271       |
| 7      | olefin        | 0.110492548       |
|        | TS            | 0.141714208       |
|        | product       | 0.146919299       |
| 8      | olefin        | 0.09177125        |
|        | TS            | 0.123764656       |
|        | product       | 0.128224851       |
| 9      | olefin        | 0.041543184       |
|        | TS            | 0.073618021       |
|        | product       | 0.07832837        |
| 10     | olefin        | 0.065137499       |
|        | TS            | 0.097252662       |
|        | product       | 0.101881286       |
| 11     | olefin        | 0.068965671       |
|        | TS            | 0.100813886       |
|        | product       | 0.106117398       |
| 12     | olefin        | 0.032731271       |
|        | TS            | 0.064544824       |
|        | product       | 0.070749163       |
| 13     | olefin        | 0.092763663       |
|        | TS            | 0.124652301       |
|        | product       | 0.129807107       |
| 14     | olefin        | 0.049497622       |
|        | TS            | 0.081410377       |
|        | product       | 0.086489414       |
| 15     | olefin        | 0.059750212       |
|        | TS            | 0.091586613       |
|        | product       | 0.097366217       |
| 16     | olefin        | 0.076876366       |
|        | TS            | 0.108555566       |
|        | product       | 0.113669949       |
| 17     | olefin        | 0.088506364       |
|        | TS            | 0.091129658       |
|        | product       | 0.082931706       |
| 18     | olefin        | 0.085316856       |
|        | TS            | 0.129957668       |
|        | product       | 0.161714981       |
|        |               | 0.166797045       |

## D. Coupled Cluster Statistical Analysis and Statistical Analysis Summaries Using an Experimental Reference

TABLE S3. Statistical comparison (kJ/mol) of CCSD(T)/aug-cc-pVTZ and DLPNO-CCSD(T)/CBS with UHF reference orbitals to that with B3LYP orbitals for 18 radical addition reactions. Statistical properties for activation energies ( $E_A$ ) and reaction enthalpies ( $\Delta H_r$ ) include mean deviation (MD), mean absolute deviation (MAD), maximum absolute deviation (MaxAD), and standard deviation (SD).

| Method                   | Property     | MD  | MAD | MaxAD | SD  |
|--------------------------|--------------|-----|-----|-------|-----|
| UHF-CCSD(T)/aug-cc-pVTZ  | $E_A$        | 3.0 | 3.0 | 6.3   | 1.9 |
|                          | $\Delta H_r$ | 1.4 | 1.4 | 4.6   | 1.8 |
| UHF-DLPNO-CCSD(T)/CBS    | $E_A$        | 3.5 | 3.5 | 6.6   | 1.4 |
|                          | $\Delta H_r$ | 1.4 | 1.5 | 4.4   | 1.5 |
| UB3LYP-DLPNO-CCSD(T)/CBS | $E_A$        | 3.9 | 3.9 | 7.6   | 1.5 |
|                          | $\Delta H_r$ | 1.1 | 1.4 | 4.6   | 1.6 |

TABLE S4. Statistical comparison (kJ/mol) of the activation energies using all computational methods in this study against experimental values for 17 radical addition reactions. Statistical properties for activation energies ( $E_A$ ) and reaction enthalpies ( $\Delta H_r$ ) include mean deviation (MD), mean absolute deviation (MAD), maximum absolute deviation (MaxAD), and standard deviation (SD).

|                                    | CBS-RAD | G3(MP2)-RAD | UHF-DLPNO/<br>CBS | UB3LYP-DLPNO/<br>CBS | UHF-CCSD(T)/<br>aug-cc-pVTZ | UB3LYP-CCSD(T)/<br>aug-cc-pVTZ |
|------------------------------------|---------|-------------|-------------------|----------------------|-----------------------------|--------------------------------|
| <b>Absolute values</b>             |         |             |                   |                      |                             |                                |
| MD                                 | -2.2    | 5.1         | 4.4               | 4.8                  | 3.9                         | 0.9                            |
| MAD                                | 2.2     | 5.5         | 4.9               | 5.3                  | 4.6                         | 2.9                            |
| MaxAD                              | 9.3     | 10.0        | 11.6              | 11.5                 | 10.6                        | 8.9                            |
| SD                                 | 2.4     | 2.7         | 3.4               | 3.2                  | 3.4                         | 3.8                            |
| <b>Relative values<sup>a</sup></b> |         |             |                   |                      |                             |                                |
| MD                                 | -1.5    | -0.6        | -0.8              | -1.3                 | -0.7                        | -1.5                           |
| MAD                                | 1.5     | 1.8         | 2.2               | 2.2                  | 2.1                         | 2.7                            |
| MaxAD                              | 8.6     | 8.6         | 9.7               | 10.5                 | 10.8                        | 11.2                           |
| SD                                 | 2.4     | 2.7         | 3.4               | 3.3                  | 3.4                         | 3.8                            |

<sup>a</sup> Relative values were calculated as the difference between reaction enthalpy for the given reaction and the corresponding value for the unsubstituted olefin (system 1)

TABLE S5. Statistical comparison (kJ/mol) of the reaction enthalpies using all computational methods in this study against experimental values for 18 radical addition reactions. Statistical properties for activation energies ( $E_A$ ) and reaction enthalpies ( $\Delta H_r$ ) include mean deviation (MD), mean absolute deviation (MAD), maximum absolute deviation (MaxAD), and standard deviation (SD).

|                                    | CBS-RAD | G3(MP2)-RAD | UHF-DLPNO/<br>CBS | UB3LYP-DLPNO/<br>CBS | UHF-CCSD(T)/<br>aug-cc-pVTZ | UB3LYP-CCSD(T)/<br>aug-cc-pVTZ |
|------------------------------------|---------|-------------|-------------------|----------------------|-----------------------------|--------------------------------|
| <b>Absolute values</b>             |         |             |                   |                      |                             |                                |
| MD                                 | -3.1    | 4.8         | -2.6              | -2.8                 | -1.9                        | -3.8                           |
| MAD                                | 4.2     | 5.2         | 5.6               | 6.0                  | 6.5                         | 6.3                            |
| MaxAD                              | 14.7    | 14.6        | 16.5              | 17.6                 | 22.4                        | 17.8                           |
| SD                                 | 4.9     | 4.3         | 7.1               | 7.5                  | 8.9                         | 7.5                            |
| <b>Relative values<sup>a</sup></b> |         |             |                   |                      |                             |                                |
| MD                                 | -5.1    | -2.4        | -3.8              | -4.2                 | -3.1                        | -4.0                           |
| MAD                                | 5.2     | 4.0         | 6.5               | 6.8                  | 7.1                         | 6.5                            |
| MaxAD                              | 16.7    | 10.3        | 17.8              | 19.0                 | 22.4                        | 17.9                           |
| SD                                 | 4.9     | 4.5         | 7.7               | 7.8                  | 9.2                         | 7.6                            |

<sup>a</sup> Relative values were calculated as the difference between reaction enthalpy for the given reaction and the corresponding value for the unsubstituted olefin (system 1)

## E. Electronic Energies

TABLE S6. Electronic energies [Hartree] computed with CCSD(T) and DLPNO-CCSD(T) for 18 radical addition reactions.

| System | Fragment      | UHF-CCSD(T)  | UKS-CCSD(T)  | norm UHF-DLPNO | norm UKS-DLPNO | tight UHF-DLPNO | tight UKS-DLPNO |
|--------|---------------|--------------|--------------|----------------|----------------|-----------------|-----------------|
| 1      | methyl        | -39.7636554  | -39.76288541 | -39.779104     | -39.77818296   | -39.77926315    | -39.77818296    |
|        | methylcyanide | -131.8718253 | -131.8699962 | -131.9215371   | -131.9187535   | -131.9217984    | -131.9190993    |
|        | methylhydroxy | -114.8988565 | -114.8976338 | -114.9459665   | -114.9444241   | -114.9461074    | -114.9443716    |
|        | olefin        | -78.44354722 | -78.4416847  | -78.475401     | -78.47375566   | -78.47550572    | -78.47370168    |
| 2      | TS            | -118.1974515 | -118.1956466 | -118.2445377   | -118.2416119   | -118.2445585    | -118.2415441    |
|        | Product       | -118.2495911 | -118.2473295 | -118.2968194   | -118.2942006   | -118.2969754    | -118.2942858    |
|        | olefin        | -117.6901194 | -117.6878137 | -117.737843    | -117.7353963   | -117.738002     | -117.7353977    |
|        | TS            | -157.4441003 | -157.4416325 | -157.5071136   | -157.503547    | -157.5070794    | -157.5032952    |
| 3      | product       | -157.496576  | -157.4935993 | -157.5599487   | -157.5565645   | -157.5600478    | -157.556445     |
|        | olefin        | -156.932363  | -156.9292852 | -156.9956579   | -156.9924595   | -156.9958579    | -156.9923951    |
|        | TS            | -196.6864647 | -196.683235  | -196.7649742   | -196.7607099   | -196.7649543    | -196.7603129    |
|        | product       | -196.738941  | -196.7351716 | -196.8178778   | -196.8138028   | -196.8180025    | -196.8135498    |
| 4      | olefin        | -156.9380148 | -156.9349432 | -157.0013613   | -156.9983026   | -157.0017387    | -156.9983234    |
|        | TS            | -196.6925404 | -196.6893336 | -196.7711917   | -196.7671017   | -196.7711874    | -196.7666335    |
|        | product       | -196.7434386 | -196.7397528 | -196.8224864   | -196.8184291   | -196.8224992    | -196.8180688    |
|        | olefin        | -232.0613341 | -232.0568677 | -232.1550748   | -232.1518957   | -232.1557649    | -232.1519293    |
| 5      | TS            | -271.814612  | -271.8109637 | -271.9231591   | -271.9191486   | -271.9233855    | -271.9186814    |
|        | product       | -271.8652335 | -271.8610989 | -271.9740658   | -271.970185    | -271.9743686    | -271.9698012    |
|        | olefin        | -232.0582161 | -232.0547364 | -232.1519057   | -232.1486282   | -232.1525766    | -232.1486891    |
|        | TS            | -271.80931   | -271.8056998 | -271.9180534   | -271.9139243   | -271.9182813    | -271.9134673    |
| 6      | product       | -271.8655289 | -271.8613237 | -271.9745232   | -271.9705178   | -271.9748496    | -271.9701052    |
|        | olefin        | -306.0061021 | -306.0021808 | -306.1284428   | -306.1253768   | -306.1296522    | -306.125476     |
|        | TS            | -345.7610196 | -345.7569367 | -345.8981272   | -345.8941538   | -345.8985938    | -345.8936499    |
|        | product       | -345.8205072 | -345.8158733 | -345.9578348   | -345.9542626   | -345.9585818    | -345.9538223    |
| 7      | olefin        | -537.5847223 | -537.579643  | -537.6493904   | -537.6440036   | -537.6498089    | -537.6440812    |
|        | TS            | -577.3408758 | -577.3356947 | -577.4207761   | -577.4142213   | -577.4208736    | -577.4140555    |
|        | product       | -577.396999  | -577.3912637 | -577.4771667   | -577.4711903   | -577.4774414    | -577.4710141    |
|        | olefin        | -368.7022574 | -368.697566  | -368.7505656   | -368.7446073   | -368.7507899    | -368.7446478    |
| 8      | TS            | -408.4582931 | -408.4534089 | -408.5217324   | -408.5146737   | -408.5218268    | -408.5145079    |
|        | product       | -408.5127809 | -408.5073792 | -408.5766672   | -408.5699902   | -408.5768913    | -408.5699062    |
|        | olefin        | -576.8348829 | -576.8290233 | -576.9149929   | -576.9089323   | -576.9156076    | -576.9090645    |
|        | TS            | -616.5911561 | -616.5852318 | -616.6865125   | -616.6794236   | -616.6866088    | -616.6790617    |
| 9      | product       | -616.6467264 | -616.6402706 | -616.7423232   | -616.7354131   | -616.742552     | -616.7353093    |
|        | olefin        | -996.7205892 | -996.7119988 | -996.817804    | -996.8087801   | -996.8186847    | -996.8090824    |
|        | TS            | -1036.478948 | -1036.470372 | -1036.591389   | -1036.581367   | -1036.591576    | -1036.581026    |
|        | product       | -1036.540392 | -1036.531234 | -1036.652811   | -1036.643381   | -1036.653259    | -1036.643137    |
| 10     | olefin        | -306.0082741 | -306.0027687 | -306.1303882   | -306.127471    | -306.1316552    | -306.127471     |
|        | TS            | -345.767047  | -345.7630438 | -345.9043863   | -345.9001305   | -345.9048084    | -345.8997277    |
|        | product       | -345.8235744 | -345.8190617 | -345.9612299   | -345.9573119   | -345.961843     | -345.9569625    |
|        | olefin        | -170.543795  | -170.5397917 | -170.6082563   | -170.6053158   | -170.6087918    | -170.6054172    |
| 11     | TS            | -210.301969  | -210.2994815 | -210.3826315   | -210.3782832   | -210.3826578    | -210.3781127    |
|        | product       | -210.3621785 | -210.3589049 | -210.4431743   | -210.4389779   | -210.4433831    | -210.4389488    |
|        | olefin        | -191.6074823 | -191.6036862 | -191.6833289   | -191.6804848   | -191.6840064    | -191.6808025    |
|        | TS            | -231.3671781 | -231.3649702 | -231.4592049   | -231.455107    | -231.4592127    | -231.4549561    |
| 12     | product       | -231.4289896 | -231.425915  | -231.5211201   | -231.5173278   | -231.5213365    | -231.5171653    |
|        | olefin        | -209.7920607 | -209.7871605 | -209.8720236   | -209.8684275   | -209.8726392    | -209.8685356    |
|        | TS            | -249.5501544 | -249.5468647 | -249.6461968   | -249.641408    | -249.6461993    | -249.6410272    |
|        | product       | -249.611733  | -249.6077458 | -249.70768     | -249.7028463   | -249.7076956    | -249.7024977    |
| 13     | olefin        | -78.44354722 | -78.4416847  | -78.475401     | -78.47375566   | -78.47550572    | -78.47370168    |
|        | TS            | -193.3331977 | -193.3310978 | -193.4115359   | -193.4082847   | -193.4116511    | -193.4082643    |
|        | product       | -193.3792513 | -193.3764805 | -193.4576355   | -193.4546868   | -193.4578632    | -193.454677     |
|        | olefin        | -78.44354722 | -78.4416847  | -78.475401     | -78.47375566   | -78.47550572    | -78.47370168    |
| 14     | TS            | -210.305364  | -210.3027076 | -210.3860443   | -210.3817216   | -210.3862881    | -210.381868     |
|        | product       | -210.3484608 | -210.3446454 | -210.4285756   | -210.42468     | -210.4289059    | -210.4246253    |
|        | olefin        | -309.059828  | -309.0530203 | -309.1979862   | -309.1922052   | -309.1986704    | -309.1923065    |
|        | product       | -348.8750066 | -348.8713948 | -349.0360109   | -349.0288592   | -349.03609      | -349.0282988    |
